# Supplementary material for: From Pd nanoparticles to single crystals: 1,3-butadiene hydrogenation on well-defined model catalysts
Source: Royal Society of Chemistry journal article supplement (doi:10.1039/b513030a), 2005-11-18
Supplement: b513030a.pdf [file b513030a.pdf]

**Electronic Supplementary Information**

**Experimental setup and catalysts preparation.** The experiments were carried out in an ultrahigh vacuum (UHV) surface analysis system combined with a UHV-high pressure reaction cell<sup>11</sup>. For sample characterization, the UHV section (base pressure  $\sim 1 \times 10^{-10}$  mbar) was equipped with low energy electron diffraction (LEED), Auger electron spectroscopy (AES) and temperature programmed desorption (TPD).

Pd-Al<sub>2</sub>O<sub>3</sub>/NiAl(110) model catalysts were prepared by growing a thin ordered Al<sub>2</sub>O<sub>3</sub> film (thickness  $\sim 0.5$  nm) on NiAl(110) by two cycles of oxidation in  $10^{-6}$  mbar O<sub>2</sub> at 523 K, followed by Pd (purity  $\geq 99.99\%$ ) electron beam evaporation at 300 K and 90 K<sup>7,9</sup>. Pd particles with a mean size from 2 to 8 nm were prepared by variation of the metal amount deposited and of the substrate temperature. All samples were annealed to 373 K prior to the reaction so that all preparations should yield crystalline particles. As revealed by scanning tunnelling microscopy (STM), Pd nanoparticles larger than 4 nm typically have the shape of truncated cubo-octahedra with distinct facets while smaller particles appear rather rounded (i.e. the facets are less pronounced and/or too small for atomic imaging)<sup>9,16</sup>.

Pd(110) and (111) single crystals ( $\sim 10 \times 2$  mm) were cleaned by annealing to 1100 K, Ar ion etching (beam voltage 900 V at  $6 \times 10^{-6}$  mbar Ar at 298 K), heating to 1100 K, oxidation during cooling down in  $5 \times 10^{-7}$  mbar O<sub>2</sub> between 1100 K and 600 K, and a final flash to 1100 K in UHV. After cooling to 90 K, well-ordered surface structures were confirmed by LEED (see inset in Fig. 1c) and TPD.

**Catalytic measurements.** The clean samples were then transferred under UHV to the reaction cell where catalytic measurements were performed at atmospheric pressure. The model catalysts were exposed to the reaction mixture ( $P_{1,3\text{-butadiene}} : 5$  mbar;  $P_{\text{H}_2} : 10$  mbar; Ar added up to 1 bar) at temperatures between 298 and 373 K. Kinetic measurements were carried out in batch mode with the gas recirculated over the catalyst by a metal bellows pump (reactor volume exchanged 5 times per minute). The reaction products were analyzed by on-line gas chromatography (GC), using a HP-PLOT/Al<sub>2</sub>O<sub>3</sub> (50 m x 0.53 mm) capillary column and an FID detector. Retention times and sensitivity factors for the reactant and products were calibrated using different gas mixtures. Employing Al<sub>2</sub>O<sub>3</sub> films on NiAl(110) as “inert” catalysts the absence of background (wall) reactions was confirmed.
